# Supplementary material for: Application of Lolium multiflorum as an Efficient Raw Material in the Production of Adsorbent for Removal of Methylene Blue
Source: MDPI journal article supplement (doi:10.3390/c9020044), 2023-04-26
Supplement: s1 [file s1]

## Supplementary material

**Table S1.** Kinetic parameters of adsorption of MB on R-40, R-70, AC-40 and AC-70. Conditions: Co, 150 mg L<sup>-1</sup>; temperature, 25°C; adsorbent dosage, 20 g L<sup>-1</sup> pH, unaltered.

| Models                    | Pseudo-first order           | Pseudo-second order          | Avrami                                             |
|---------------------------|------------------------------|------------------------------|----------------------------------------------------|
| <b>Adsorbent R-40</b>     |                              |                              |                                                    |
| Parameters                | $q_e = 7.40$<br>$k_1 = 2.61$ | $q_e = 7.41$<br>$k_2 = 8.96$ | $q_e = 7.41$<br>$k_{av} = 4.32$<br>$n_{av} = 1.66$ |
| $R^2$ (10 <sup>-2</sup> ) | 99.99                        | 99.99                        | 99.99                                              |
| $X^2$ (10 <sup>-2</sup> ) | 0.03                         | 0.02                         | 0.05                                               |
| ARE (%)                   | 0.18                         | 0.147                        | 0.224                                              |
| $MQ_R/MQ_r$               | 266396.23                    | 431474.78                    | 82275.00                                           |
| $F(R,r)$                  | 4.49                         | 4.49                         | 3.68                                               |
| $MQ_{faj}/MQ_{ep}$        | 3.05                         | 1.39                         | 6.14                                               |
| $F(faj,ep)$               | 3.29                         | 3.29                         | 3.37                                               |
| <b>Adsorbent R-70</b>     |                              |                              |                                                    |
| Parameters                | $q_e = 7.48$<br>$k_1 = 0.88$ | $q_e = 7.49$<br>$k_2 = 2.05$ | $q_e = 7.48$<br>$k_{av} = 4.32$<br>$n_{av} = 0.48$ |
| $R^2$ (10 <sup>-2</sup> ) | 99.99                        | 99.99                        | 99.99                                              |
| $X^2$ (10 <sup>-2</sup> ) | 0.17                         | 0.02                         | 0.13                                               |
| ARE (%)                   | 0.12                         | 0.13                         | 0.24                                               |
| $MQ_R/MQ_r$               | 575365.74                    | 469051.38                    | 35519.67                                           |
| $F(R,r)$                  | 4.49                         | 4.49                         | 3.68                                               |
| $MQ_{faj}/MQ_{ep}$        | 0.84                         | 1.32                         | 17.34                                              |
| $F(faj,ep)$               | 3.29                         | 3.29                         | 3.37                                               |
| <b>Adsorbent AC-40</b>    |                              |                              |                                                    |
| Parameters                | $q_e = 6.69$<br>$k_1 = 0.25$ | $q_e = 7.30$<br>$k_2 = 0.11$ | $q_e = 7.23$<br>$k_{av} = 0.71$<br>$n_{av} = 0.42$ |
| $R^2$ (10 <sup>-2</sup> ) | 96.50                        | 99.75                        | 98.75                                              |
| $X^2$ (10 <sup>-2</sup> ) | 17.50                        | 1.20                         | 7.20                                               |
| ARE (%)                   | 5.49                         | 1.21                         | 2.71                                               |
| $MQ_R/MQ_r$               | 441.17                       | 6874.32                      | 597.24                                             |
| $F(R,r)$                  | 4.49                         | 4.49                         | 3.68                                               |
| $MQ_{faj}/MQ_{ep}$        | 53.40                        | 2.53                         | 22.32                                              |
| $F(faj,ep)$               | 3.29                         | 3.29                         | 3.37                                               |
| <b>Adsorbent AC-70</b>    |                              |                              |                                                    |
| Parameters                | $q_e = 7.45$<br>$k_1 = 1.20$ | $q_e = 7.53$<br>$k_2 = 0.62$ | $q_e = 7.49$<br>$k_{av} = 3.91$<br>$n_{av} = 0.42$ |
| $R^2$ (10 <sup>-2</sup> ) | 99.87                        | 99.96                        | 99.47                                              |
| $X^2$ (10 <sup>-2</sup> ) | 0.70                         | 0.20                         | 3.40                                               |
| ARE (%)                   | 0.76                         | 0.47                         | 1.21                                               |
| $MQ_R/MQ_r$               | 13161.29                     | 40081.09                     | 1411.32                                            |
| $F(R,r)$                  | 4.49                         | 4.49                         | 3.68                                               |
| $MQ_{faj}/MQ_{ep}$        | 6.48                         | 1.26                         | 37.96                                              |
| $F(faj,ep)$               | 3.29                         | 3.29                         | 3.37                                               |

**Table S2.** Isothermal parameters of adsorption of MB on R-40, R-70, AC-40 and AC-70 at 25°C. Conditions: adsorbent dosage, 4 g L<sup>-1</sup>, for R-40 and R-70, and 20 g L<sup>-1</sup>, for AC-40 and AC-70; pH, unaltered; contact time, 60 min.

| Models                    | Langmuir                          | Freundlich                  | Sips                                            | Tóth                                           |
|---------------------------|-----------------------------------|-----------------------------|-------------------------------------------------|------------------------------------------------|
| Adsorbent R-40            |                                   |                             |                                                 |                                                |
| Parameters                | $q_{max} = 86.03$<br>$K_L = 2.64$ | $K_F = 33.81$<br>$n = 3.29$ | $q_{max} = 82.34$<br>$K_S = 0.95$<br>$m = 1.25$ | $q_{max} = 80.79$<br>$b = 0.60$<br>$d = 1.06$  |
| $R^2$ (10 <sup>-2</sup> ) | 98.97                             | 88.32                       | 99.50                                           | 99.62                                          |
| $X^2$ (10 <sup>-2</sup> ) | 956.18                            | 10911.20                    | 499.97                                          | 375.04                                         |
| ARE (%)                   | 11.24                             | 52.17                       | 10.92                                           | 8.26                                           |
| $MQ_R/MQ_r$               | 1354.70                           | 105.94                      | 1302.27                                         | 1738.24                                        |
| $F(R,r)$                  | 4.60                              | 4.60                        | 3.81                                            | 3.81                                           |
| $MQ_{faj}/MQ_{ep}$        | 255.12                            | 2879.02                     | 151.00                                          | 114.70                                         |
| $F(faj,ep)$               | 3.58                              | 3.58                        | 3.69                                            | 3.69                                           |
| Adsorbent R-70            |                                   |                             |                                                 |                                                |
| Parameters                | $q_{max} = 53.32$<br>$K_L = 2.14$ | $K_F = 25.08$<br>$n = 5.13$ | $q_{max} = 63.81$<br>$K_S = 0.70$<br>$m = 0.50$ | $q_{max} = 70.21$<br>$b = 20.96$<br>$d = 0.34$ |
| $R^2$ (10 <sup>-2</sup> ) | 96.53                             | 95.20                       | 99.23                                           | 99.36                                          |
| $X^2$ (10 <sup>-2</sup> ) | 1422.70                           | 1973.75                     | 340.77                                          | 282.04                                         |
| ARE (%)                   | 17.3                              | 23.56                       | 6.52                                            | 6.90                                           |
| $MQ_R/MQ_r$               | 390.57                            | 277.69                      | 838.02                                          | 1013.87                                        |
| $F(R,r)$                  | 4.60                              | 4.60                        | 3.81                                            | 3.81                                           |
| $MQ_{faj}/MQ_{ep}$        | 324.51                            | 442.48                      | 87.97                                           | 73.56                                          |
| $F(faj,ep)$               | 3.58                              | 3.58                        | 3.69                                            | 3.69                                           |
| Adsorbent AC-40           |                                   |                             |                                                 |                                                |
| Parameters                | $q_{max} = 8.28$<br>$K_L = 0.84$  | $n = 2.62$<br>$K_F = 5.37$  | $q_{max} = 8.67$<br>$K_S = 2.33$<br>$m = 0.92$  | $q_{max} = 8.84$<br>$b = 2.85$<br>$d = 0.85$   |
| $R^2$ (10 <sup>-2</sup> ) | 98.58                             | 93.82                       | 98.67                                           | 98.66                                          |
| $X^2$ (10 <sup>-2</sup> ) | 6.64                              | 29.04                       | 6.76                                            | 6.76                                           |
| ARE (%)                   | 7.82                              | 16.09                       | 8.02                                            | 7.99                                           |
| $MQ_R/MQ_r$               | 977.10                            | 212.70                      | 480.50                                          | 480.60                                         |
| $F(R,r)$                  | 4.60                              | 4.60                        | 3.81                                            | 3.81                                           |
| $MQ_{faj}/MQ_{ep}$        | 3427.71                           | 15134.05                    | 3882.04                                         | 3880.74                                        |
| $F(faj,ep)$               | 3.58                              | 3.58                        | 3.69                                            | 3.69                                           |
| Adsorbent AC-70           |                                   |                             |                                                 |                                                |
| Parameters                | $q_{max} = 43.83$<br>$K_L = 3.05$ | $n = 4.20$<br>$K_F = 22.14$ | $q_{max} = 52.66$<br>$K_S = 1.56$<br>$m = 0.66$ | $q_{max} = 53.3$<br>$b = 7.55$<br>$d = 0.49$   |
| $R^2$ (10 <sup>-2</sup> ) | 95.10                             | 89.50                       | 97.00                                           | 97.40                                          |
| $X^2$ (10 <sup>-2</sup> ) | 1013.09                           | 2165.41                     | 645.60                                          | 573.21                                         |
| ARE (%)                   | 24.50                             | 53.57                       | 29.64                                           | 27.71                                          |
| $MQ_R/MQ_r$               | 351.81                            | 155.01                      | 281.65                                          | 318.30                                         |
| $F(R,r)$                  | 4.60                              | 4.60                        | 3.81                                            | 3.81                                           |
| $MQ_{faj}/MQ_{ep}$        | 661.98                            | 1400.07                     | 451.50                                          | 399.11                                         |
| $F(faj,ep)$               | 3.58                              | 3.58                        | 3.69                                            | 3.69                                           |
